# Supplementary material for: SKN-1 regulates stress resistance downstream of amino catabolism pathways
Source: iScience. 2022 Jun 9;25(7):104571. doi: 10.1016/j.isci.2022.104571 (PMC9240870; doi:10.1016/j.isci.2022.104571)

## **Supplemental information**

### **SKN-1 regulates stress resistance**

#### **downstream of amino catabolism pathways**

**Phillip A. Frankino, Talha F. Siddiqi, Theodore Bolas, Raz Bar-Ziv, Holly K. Gildea, Hanlin Zhang, Ryo Higuchi-Sanabria, and Andrew Dillin**

**Figure S1. *amdh-1* mutants do not upregulate *gcs-1* expression, Related to Figure 1**

(A) Schematic of *amdh-1/T12A2.1* genomic locus showing the location of allele *uth29* engineered using CRISPR/Cas9 (top, arrow). Scale bar, 100 bases. (B) Fluorescent images of SKN-1 reporter worms (*gcs-1p::GFP*) fed RNAi targeting *amdh-1* and *wdr-23*. Scale bar, 100  $\mu$ m. (C) Quantification of (B), Data shown are representative of n = 4 biological replicates with n > 60 animals per condition for each replicate. \*\*\*\* = P < 0.0001, n.s. = not significant using a one-way ANOVA non-parametric test (Kruskal-wallis).

**Figure S2. *gcn-2* and *let-363* are partially required for SKN-1 activation in *amdh-1* mutants, Related to Figure 2**

(A) Fluorescent images of SKN-1 reporter animals (*gst-4p::GFP*) fed RNAi targeting. Scale bar, 100  $\mu$ m. (B) Quantification of (A), Data shown are representative of n = 2 biological replicates with n > 123 animals per condition for each replicate. (C) Table of causative mutations mapped using whole genome sequencing.

**Figure S3. *haly-1* is required for SKN-1 activation in *amdh-1* mutants, Related to Figure 3**

(A) Schematic of *haly-1* genomic DNA (gDNA) rescue array used for genetic rescue experiments to confirm causality (B) Fluorescent images of *haly-1; amdh-1* double mutants with or without *haly-1* gDNA rescue array. Scale bar, 100  $\mu$ m.

**Figure S4. Stress response pathways are not activated in *amdh-1* mutants, Related to Figure 4**

(A) Fluorescent images of heat shock response (HSR) reporter animals (*hsp-70p::GFP*) with or without heat shock treatments (34°C) in wildtype and *amdh-1(uth29)* mutant animals. Data shown are representative of  $n = 3$  biological replicates. Scale bar, 100  $\mu\text{m}$ . (B) Fluorescent images of a reporter of the unfolded protein response of the ER (UPR ER) animals (*hsp-4p::GFP*) fed RNAi. Scale bar, 100  $\mu\text{m}$ . (C) Quantification of (B), Data shown are representative of  $n = 3$  biological replicates with  $n > 50$  animals per condition for each replicate. \*\*\*\* =  $P < 0.0001$ , n.s. = not significant using a one-way ANOVA non-parametric test (Kruskal-wallis) (D) Fluorescent images of UPR Mito reporter animals (*hsp-6p::GFP*) fed RNAi. Scale bar, 100  $\mu\text{m}$ . (E) Quantification of (D), Data shown are representative of  $n = 3$  biological replicates with  $n > 50$  animals per condition for each replicate. \*\*\*\* =  $P < 0.0001$ , n.s. = not significant using a one-way ANOVA non-parametric test (Kruskal-wallis)

**Figure S1**

**A**

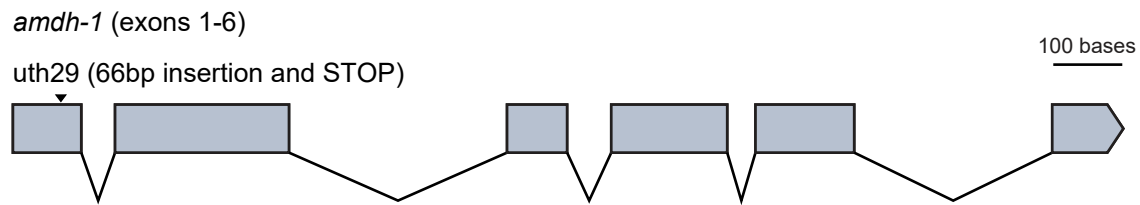

**B**

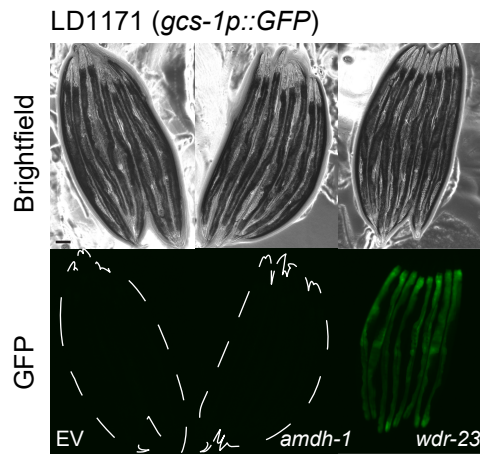

**C**

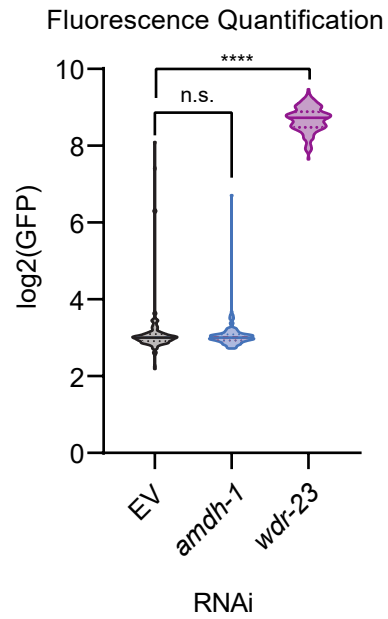

Figure S2

A

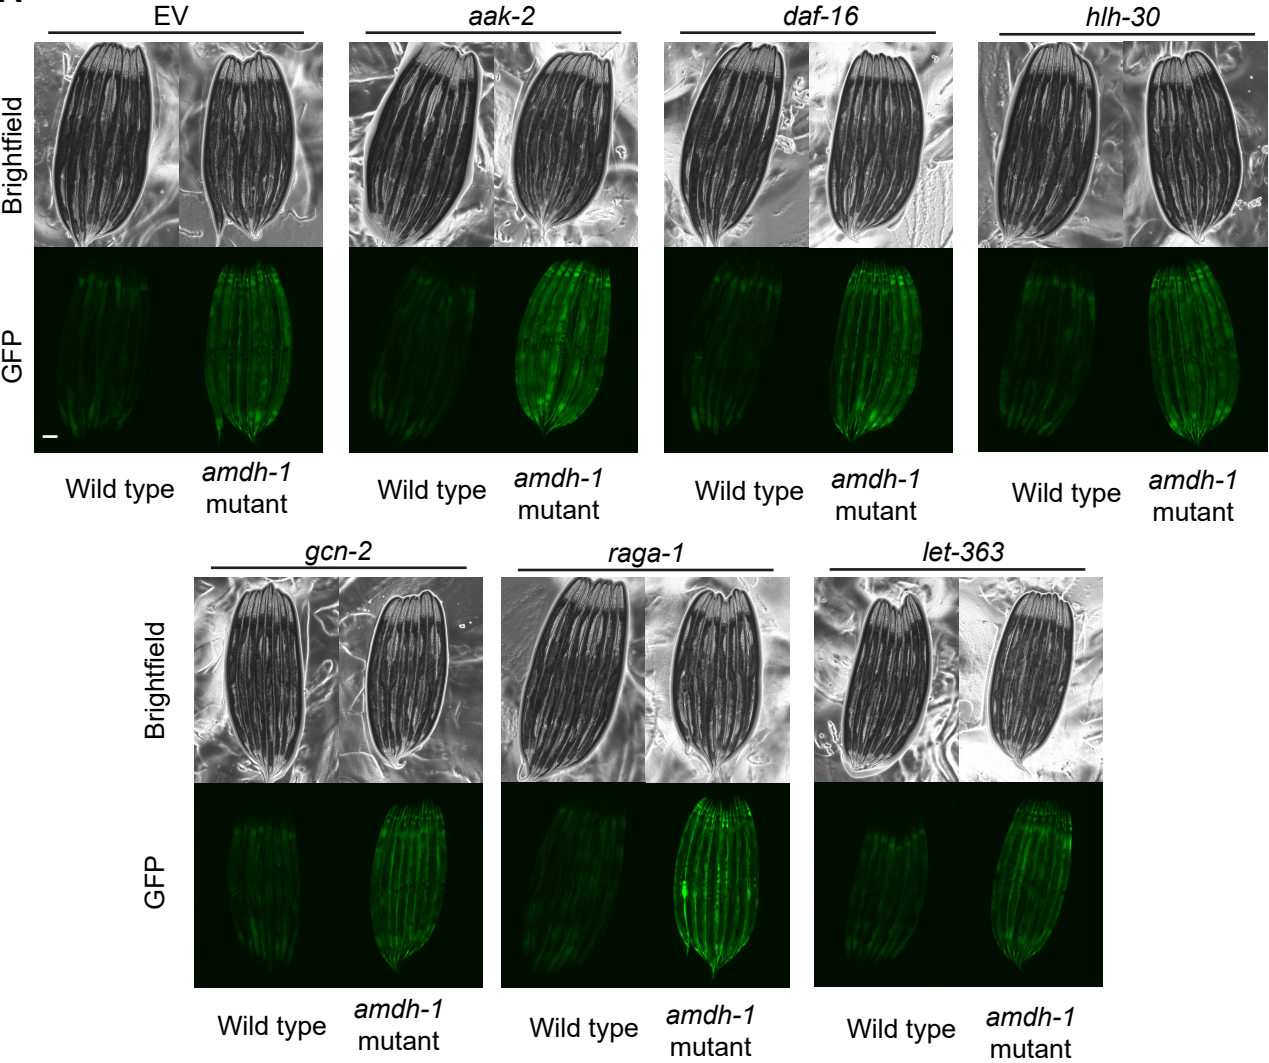

B

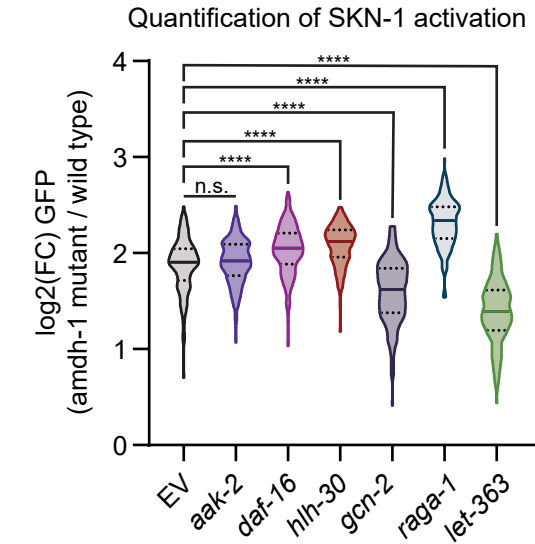

C

| Allele        | Gene          | Mutation |
|---------------|---------------|----------|
| <i>uth89</i>  | <i>skn-1</i>  | A514T    |
| <i>uth94</i>  | <i>elt-3</i>  | Q128*    |
| <i>uth112</i> | <i>suco-1</i> | A429M    |
| <i>uth92</i>  | <i>haly-1</i> | G134E    |
| <i>uth93</i>  | <i>haly-1</i> | G265E    |
| <i>uth95</i>  | <i>haly-1</i> | G551V    |

**A**

Endogenous Promoter 5' UTR *haly-1* genomic DNA 3' UTR

1.1 kb 0.3 kb 2.6 kb 0.3 kb

B

*amdh-1(uth29);  
haly-1(uth93)*

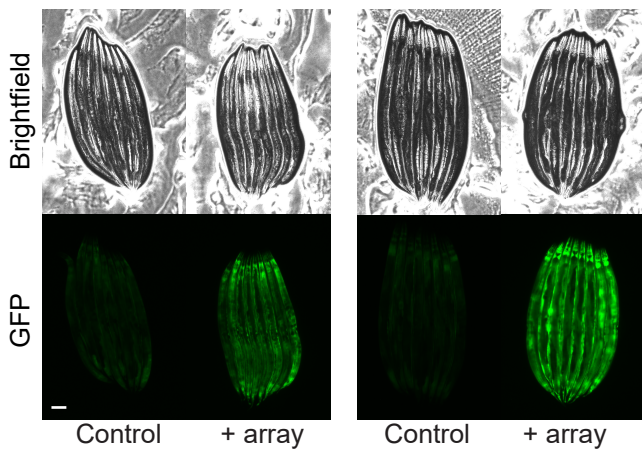

**Figure S4****A**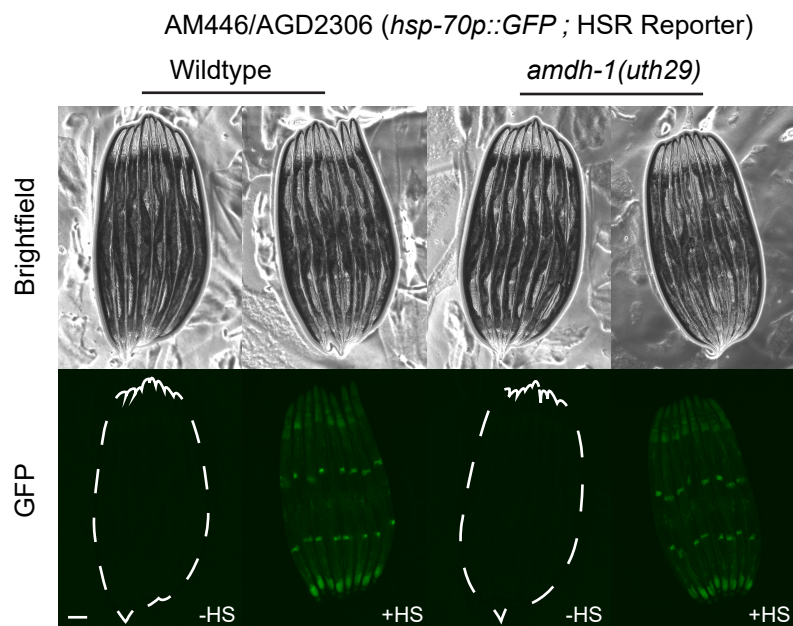**B**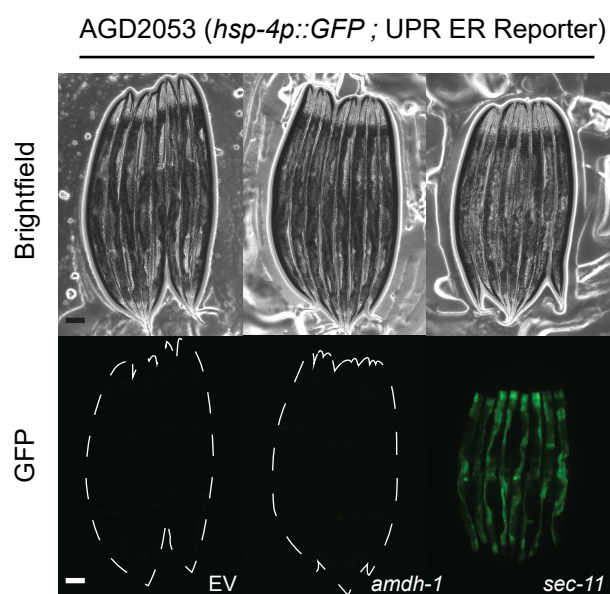**C**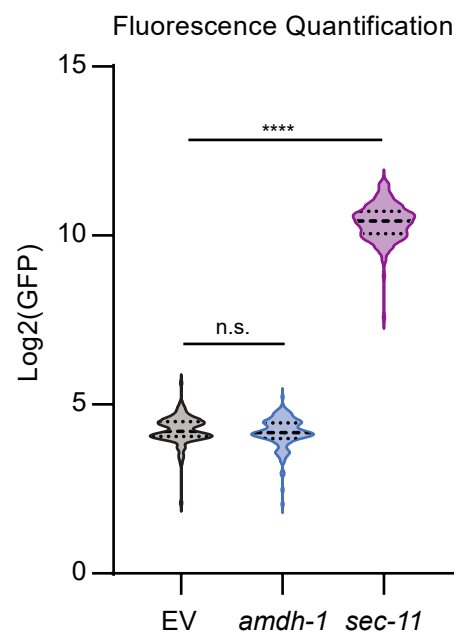**D**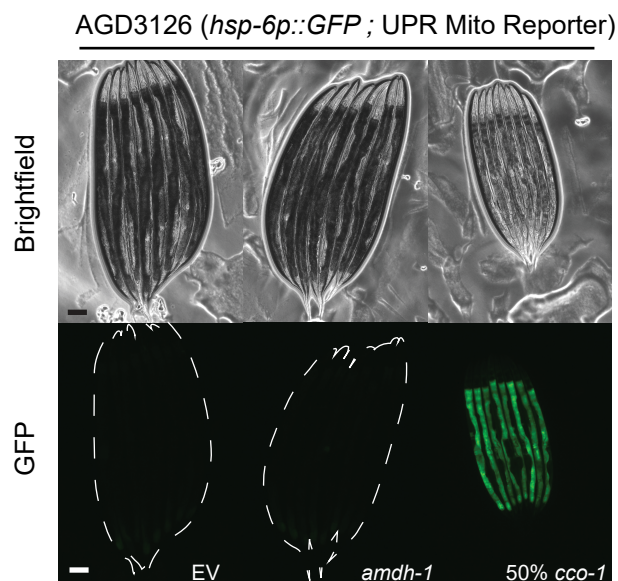**E**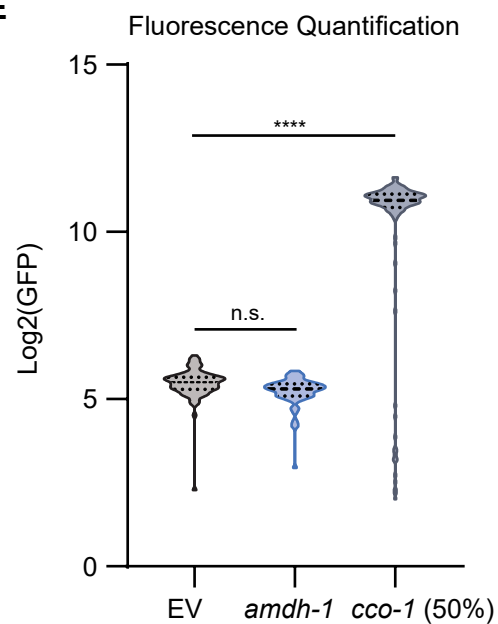

Supplement: Document S1. Figures S1–S4 [file mmc1.pdf]
